# Supplementary material for: Depression and Its Severity Are Strongly Associated with Both Storage and Voiding Lower Urinary Tract Symptoms Independently of Prostate Volume
Source: PubMed Central journal article supplement — J Korean Med Sci. 2015 Oct 16;30(11):1646–51. doi: 10.3346/jkms.2015.30.11.1646 (PMC4630482; doi:10.3346/jkms.2015.30.11.1646), 2015-10-16
Supplement: jkms-30-1646-s001.pdf [file jkms-30-1646-s001.pdf]

**Supplement Table 1.** The comparison of general characteristics between participants with prostate volume data and participants without prostate volume data

| Parameters                                        | Subjects with TRUS<br>n = 1,925 | Subjects without TRUS<br>n = 8,350 | P value <sup>‡</sup> |
|---------------------------------------------------|---------------------------------|------------------------------------|----------------------|
| Age (yr)                                          | 56.8 ± 8.0                      | 51.0 ± 9.5                         | < 0.001              |
| Total LUTS, No. (%)                               |                                 |                                    | < 0.001              |
| None-mild*                                        | 866 (45.0)                      | 5,383 (64.5)                       |                      |
| Moderate-severe <sup>†</sup>                      | 1,059 (55.0)                    | 2,967 (35.5)                       |                      |
| Voiding symptoms, No. (%)                         |                                 |                                    | < 0.001              |
| None-mild                                         | 898 (46.7)                      | 5,480 (65.6)                       |                      |
| Moderate-severe                                   | 1,027 (53.3)                    | 2,870 (34.4)                       |                      |
| Storage symptoms, No. (%)                         |                                 |                                    | < 0.001              |
| None-mild                                         | 1,022 (53.1)                    | 5,771 (69.1)                       |                      |
| Moderate-severe                                   | 903 (46.9)                      | 2,579 (30.9)                       |                      |
| Depression by BDI, No. (%)                        |                                 |                                    | 0.215                |
| None (0-13)                                       | 1,793 (93.1)                    | 7,877 (94.4)                       |                      |
| Mild (14-19)                                      | 101 (5.3)                       | 353 (4.2)                          |                      |
| Moderate (20-28)                                  | 25 (1.3)                        | 101 (1.2)                          |                      |
| Severe (29-63)                                    | 6 (0.3)                         | 19 (0.2)                           |                      |
| Smoking, No. (%)                                  |                                 |                                    | < 0.001              |
| Never                                             | 611 (31.7)                      | 2,289 (27.4)                       |                      |
| Former                                            | 961 (50.0)                      | 3,682 (44.1)                       |                      |
| Current                                           | 353 (18.3)                      | 2,379 (28.5)                       |                      |
| Alcohol consumption amount <sup>§</sup> , No. (%) |                                 |                                    | < 0.001              |
| 0                                                 | 119 (6.2)                       | 806 (9.7)                          |                      |
| 0 < and ≤ 4 drinks/day                            | 1,757 (91.3)                    | 7,151 (85.6)                       |                      |
| 4 drinks/day <                                    | 49 (2.5)                        | 393 (4.7)                          |                      |
| BMI (kg/m <sup>2</sup> )                          | 24.3 ± 2.4                      | 24.5 ± 2.6                         | 0.002                |
| Hypertension, No. (%)                             |                                 |                                    | < 0.001              |
| No                                                | 1,295 (67.3)                    | 6,022(72.1)                        |                      |
| Yes                                               | 630 (32.7)                      | 2,328(27.9)                        |                      |
| Diabetes, No. (%)                                 |                                 |                                    | < 0.001              |
| No                                                | 1,619 (84.1)                    | 7,359 (88.1)                       |                      |
| Yes                                               | 306 (15.9)                      | 991 (11.9)                         |                      |

Plus-minus values are means ± SD. \*<sup>†</sup>None to mild LUTS: under 7 points of total IPSS, moderate to severe LUTS: over 7 points of total IPSS; <sup>‡</sup>P values were calculated by two-tailed Student's *t*-test for continuous variables, and by chi-square test for categorical variables; <sup>§</sup>One standard drink means 14 g of pure alcohol. LUTS, lower urinary tract symptoms; BDI, Beck depression inventory; BMI, body mass index; TRUS, transrectal ultrasonography.
